# Supplementary material
Source: publisher figshare collection journal article supplement (https://tandf.figshare.com/ndownloader/files/22904786)
Supplement: Supplementary file 1 [file 22904786]

Figure A1: Study outline.

Table A1: Characteristics related to the driver and the current driving trip

|  | **Culpable**  (n = 133) | | **Nonculpable**  (*n* = 12) | | **Total**  (*n* = 145) | |
| --- | --- | --- | --- | --- | --- | --- |
| *n* | % | *n* | % | *n* | % |
| Gender  Male  Female | 102  31 | 77  23 | 6  6 | 50  50 | 108  37 | 74  26 |
| Age  16–17 years  18–20 years  21–24 years | 4  84  45 | 3  63  34* | 0  4  8 | 0  33  67 | 4  88  53 | 3  61  37 |
| Duration of driving licensea  No/invalid driving license  ≤6 months  >6 months to 1 year  >1 year to 2 years  >2 years | 4  40  10  19  32 | 4  38  10  18  30* | 0  2  0  0  8 | 0  20  0  0  80 | 4  42  10  19  40 | 3  37  9  17  35 |
| Speeding (exceeding posted speed limit, driving too fast for conditions, or driving hazardously)  Yes  No | 106  27 | 80*  20 | 1  11 | 8  92 | 107  38 | 74  26 |
| Driving under the influence of alcohol/drugs  Yes  No | 34  93 | 27  73 | 0  12 | 0  100 | 34  105 | 24  76 |
| Use of a seatbelt  No  Yes | 30  103 | 23  77 | 1  11 | 8  92 | 31  114 | 21  79 |
| Outcome for driver  Fatal injury  Nonfatal, severe injury (AIS score ≥2)  Nonfatal, minor injury (AIS score = 0/1)  Nonfatal, AIS score unknown | 20  56  53  4 | 51  42  40  3 | 2  4  6  0 | 17  33  50  0 | 22  60  59  4 | 15  41  41  3 |
| Driver involved in previous MVCa,b  Yes  No | 26  70 | 27  73 | 2  7 | 22  78 | 28  77 | 27  73 |
| Driver reported previously driving faster than 150 km/h) on public roadsa,b  Yes  No | 37  34 | 52  48 | 0  3 | 0  100 | 37  37 | 50  50 |
| Purpose of the driving tripa,b  Socializing with family/friends  Related to job/school  Partying/cruising  Other | 42  14  29  9 | 45  15  31  10 | 5  2  0  2 | 56  22  0  22 | 47  16  29  11 | 46  16  28  11 |
| Mileage of the current driving trip before the collisiona,b  0–24 km  25–49 km  50–99 km  ≥100 km | 64  10  10  10 | 68  11  11  11 | 5  1  2  1 | 56  11  22  11 | 69  11  12  11 | 67  11  12  11 |
| Presence of youth passengers  No  Yes | 77  56 | 58  42 | 6  6 | 50  50 | 83  62 | 57  43 |
| AIS, Abbreviated Injury Scale  *Significantly different (*p* < 0.05) compared to nonculpable drivers (reference group)  a Total number differs since current information was missing in several cases  b Self-reported by the drivers | | | | | | |

**Table A2: Road type and conditions at the time of the collision**

|  | **Culpable**  (*n* = 133) | | **Nonculpable**  (*n* = 12) | | **Total**  (*n* = 145) | |
| --- | --- | --- | --- | --- | --- | --- |
| *n* | % | *n* | % | *n* | % |
| Season  Winter (December to February)  Spring (March to May)  Summer (June to August)  Autumn (September to November) | 27  29  44  33 | 20  22  33  25 | 2  4  3  3 | 17  33  25  25 | 29  33  47  36 | 20  23  32  25 |
| Time of day  0000–0600 hours  0600–1200 hours  1200–1800 hours  1800–2400 hours | 48  17  34  34 | 36  13  26  26 | 3  3  3  3 | 25  25  25  25 | 51  20  37  37 | 35  14  26  26 |
| Area  Urban  Rural | 14  119 | 11  89 | 1  11 | 8  92 | 15  130 | 10  90 |
| Road topography  Curved  Straight | 80  53 | 60  40 | 6  6 | 50  50 | 86  59 | 59  41 |
| Road visibility  Good  Bad | 122  11 | 92  8 | 11  1 | 92  8 | 133  12 | 92  8 |
| Lighting conditions  Daylight or road lighting  Twilight or darkness | 87  46 | 65  35 | 11  1 | 92  8 | 98  47 | 68  32 |
| Precipitation  None  Rain/snow | 108  25 | 81  19 | 8  4 | 67  33 | 116  29 | 80  20 |
| Road surface  Dry asphalt  Wet/icy asphalt | 77  56 | 58  42 | 8  4 | 67  33 | 85  60 | 59  41 |
| Posted speed limit  ≤50 km/h  60 km/h  70 km/h  80 km/h  ≥90 km/h | 20  36  15  57  5 | 15  27  11  43  4 | 1  3  1  5  2 | 8  25  8  42  17 | 21  39  16  62  7 | 14  27  11  43  5 |
| Barriers between opposing lanes  Yes  No | 3  130 | 2  98 | 1  11 | 8  92 | 4  141 | 3  97 |
